# Supplementary material
Source: PubMed Central journal article supplement (PMC3383649)
Supplement: NIHMS382031-supplement-supplement_1.pdf [file NIHMS382031-supplement-supplement_1.pdf]

# Supplemental Information

## Draft genome of *Omphalotus olearius* provides a predictive framework for sesquiterpenoid natural product biosynthesis in Basidiomycota

Grayson T. Wawrzyn, Maureen B. Quin, Swati Choudhary, Fernando López-Gallego and Claudia Schmidt-Dannert

### Table of Contents

|                                                                                                             |    |
|-------------------------------------------------------------------------------------------------------------|----|
| <a href="#">SUPPLEMENTAL DATA</a> .....                                                                     | 39 |
| <a href="#">Supplemental Tables</a> .....                                                                   | 39 |
| <a href="#">Table S1</a> .....                                                                              | 39 |
| <a href="#">Table S2</a> .....                                                                              | 40 |
| <a href="#">Table S3</a> .....                                                                              | 41 |
| <a href="#">Table S4</a> .....                                                                              | 42 |
| <a href="#">Table S5</a> .....                                                                              | 44 |
| <a href="#">Table S6</a> .....                                                                              | 47 |
| <a href="#">Supplemental Figures</a> .....                                                                  | 48 |
| <a href="#">Figure S1</a> .....                                                                             | 48 |
| <a href="#">Figure S2</a> .....                                                                             | 49 |
| <a href="#">Figure S3</a> .....                                                                             | 50 |
| <a href="#">Figure S4</a> .....                                                                             | 51 |
| <a href="#">Figure S5</a> .....                                                                             | 52 |
| <a href="#">KEY FOR SUPPLEMENTAL DATA SETS 1-3</a> .....                                                    | 53 |
| <a href="#">SUPPLEMENTAL EXPERIMENTAL PROCEDURES</a> .....                                                  | 54 |
| <a href="#">Cloning of sesquiterpene synthases</a> .....                                                    | 54 |
| <a href="#">Overexpression and purification of Omp6 and Omp7</a> .....                                      | 54 |
| <a href="#">Homology searches, phylogenetic tree construction and biosynthetic cluster prediction</a> ..... | 55 |
| <a href="#">Quantitative RT-PCR</a> .....                                                                   | 57 |
| <a href="#">SUPPLEMENTAL REFERENCES</a> .....                                                               | 58 |

## SUPPLEMENTAL DATA

### Supplemental Tables

**Table S1** Assembly summary for the genome of *O. olearius* (DC.) Singer strain VT-653.13. See **Figure 2** for *in vivo* production of sesquiterpenes by *O. olearius*.

---

| <b>Parameter</b>               |            |
|--------------------------------|------------|
| Genome size                    | 28.15 Mbp  |
| Scaffold number                | 868        |
| Scaffold N50                   | 199,357 bp |
| Scaffold N90                   | 22,541 bp  |
| Estimated genome coverage      | 94.16 %    |
| GC% transcript                 | 50.08 %    |
| GC% intergenic                 | 45.23 %    |
| Predicted protein coding genes | 8,172      |
| Percent of total genome        | 44.24 %    |
| Mean gene length               | 1,523 bp   |

---

**Table S2** Sequence details for cloned *O. olearius* sesquiterpene synthases. Peptide reference numbers refer to predicted sequences in **Data S1**. Gene and transcript length listed are measured in base pairs and protein length is measured in amino acids. Graphical representations of intron/exon organization were created using GSDS (Guo et al., 2007). See **Figure 3** for sesquiterpenes produced by each gene.

| Gene         | Peptide reference      | Scaffold number | Gene start | Gene stop | Gene length | # of introns | Transcript length | Protein length |
|--------------|------------------------|-----------------|------------|-----------|-------------|--------------|-------------------|----------------|
| <b>Omp1</b>  | MUStwsD_GLEAN_10001317 | 131             | 23448      | 22256     | 1192        | 3            | 999               | 332            |
| <b>Omp2</b>  | MUStwsD_GLEAN_10002575 | 63              | 27510      | 26270     | 1240        | 4            | 1002              | 333            |
| <b>Omp3</b>  | MUStwsD_GLEAN_10003938 | 33              | 137438     | 135914    | 1524        | 6            | 1104              | 367            |
| <b>Omp4</b>  | MUStwsD_GLEAN_10005581 | 14              | 149118     | 150371    | 1253        | 4            | 1035              | 344            |
| <b>Omp5a</b> | MUStwsD_GLEAN_10000810 | 182             | 25829      | 24552     | 1277        | 4            | 1038              | 345            |
| <b>Omp5b</b> | MUStwsD_GLEAN_10000811 | 182             | 28337      | 27066     | 1271        | 4            | 1038              | 345            |
| <b>Omp6</b>  | MUStwsD_GLEAN_10003820 | 35              | 114288     | 113036    | 1252        | 3            | 1074              | 357            |
| <b>Omp7</b>  | MUStwsD_GLEAN_10000831 | 179             | 28809      | 30073     | 1264        | 4            | 1038              | 345            |
| <b>Omp8</b>  | MUStwsD_GLEAN_10000534 | 223             | 21771      | 20858     | 913         | 2            | 1044              | 347            |
| <b>Omp9</b>  | MUStwsD_GLEAN_10000543 | 223             | 11690      | 10443     | 1247        | 3            | 1053              | 350            |
| <b>Omp10</b> | MUStwsD_GLEAN_10000292 | 285             | 10962      | 9810      | 1152        | 3            | 987               | 328            |

#### Confirmed intron/exon organization

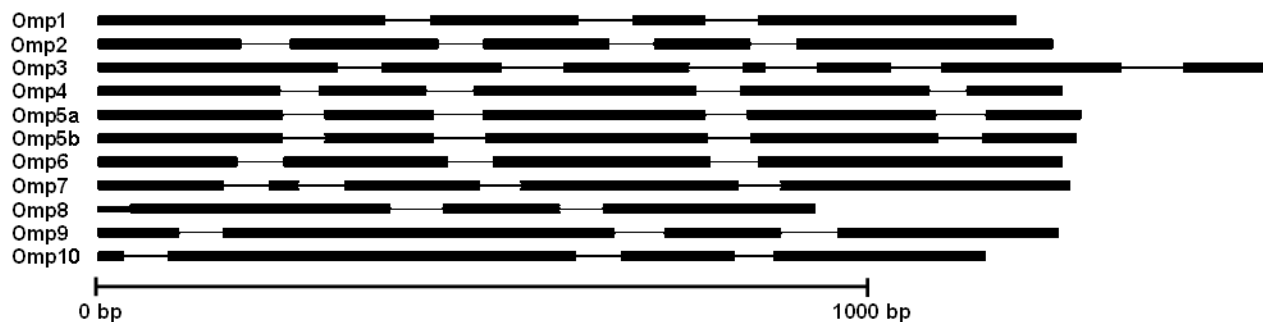

**Table S3** Sequence details for cloned putative biosynthetic genes co-located in clusters with Omp6 or Omp7. Gene numbers refer to putative protein predictions in **Figure 5**. Peptide reference numbers refer to predicted sequences in **Data S1**. Gene and transcript length listed are measured in base pairs and protein length is measured in amino acids. Graphical representations of intron/exon organization were created using GSDS (Guo et al., 2007).

| Gene               | Peptide reference      | Scaffold number | Gene start | Gene stop | Gene length | # of introns | Transcript length | Protein length |
|--------------------|------------------------|-----------------|------------|-----------|-------------|--------------|-------------------|----------------|
| <b><u>Omp6</u></b> |                        |                 |            |           |             |              |                   |                |
| 6-h                | MUStwsD_GLEAN_10003819 | 35              | 107497     | 109609    | 2112        | 6            | 1737              | 579            |
| 6-i                | MUStwsD_GLEAN_10003819 | 35              | 110221     | 112383    | 2162        | 9            | 1602              | 534            |
| 6-j                | MUStwsD_GLEAN_10003821 | 35              | 115022     | 116998    | 1976        | 7            | 1599              | 533            |
| 6-k                | MUStwsD_GLEAN_10003822 | 35              | 117853     | 120355    | 2502        | 11           | 1908              | 635            |
| 6-l                | MUStwsD_GLEAN_10003823 | 35              | 121648     | 120433    | 1215        | 3            | 1050              | 349            |
| <b><u>Omp7</u></b> |                        |                 |            |           |             |              |                   |                |
| 7-b                | MUStwsD_GLEAN_10000830 | 179             | 28175      | 26111     | 2064        | 8            | 1620              | 539            |

**Confirmed intron/exon organization**

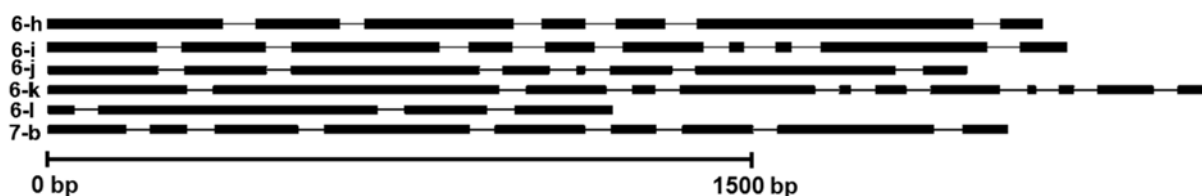

**Table S4** Sesquiterpene synthases (STS) identified in analyzed Basidiomycota genomes. Initial BLAST results were aligned and erroneous/incomplete sequences removed. Shown are total number of identified, putative STS (initial) and number of eliminated sequences lacking conserved active site motifs (NSE/DTE or DDxxDD) or failing to fall in the 250-425 amino acid length range expected for STS. The sequences removed accounted for ~28 % of the initial BLAST results. The final set of sequences was used for phylogenetic analysis shown in **Figure 7**. The full phylogram, including STS sequence identifiers, is provided in **Data S2**. Genome abbreviations are those used in the fungal genome database at the Joint Genome Institute (<http://genome.jgi-psf.org/programs/fungi/index.jsf>).

| Abbreviation      | Basidiomycota Reference Genome                          | Initial   | NSE/DTE | DDxxD | Length | Final     |
|-------------------|---------------------------------------------------------|-----------|---------|-------|--------|-----------|
| Agabi_varbisH97_2 | <i>Agaricus bisporus</i> var <i>bisporus</i> (H97) v2.0 | 9         | 1       |       | 3      | 5         |
| Agabi_varbur_1    | <i>Agaricus bisporus</i> var. <i>burnettii</i> JB137-S8 | 9         |         |       | 3      | 6         |
| Aurde1            | <i>Auricularia delicata</i> SS-5 v1.0                   | 19        | 3       |       | 1      | 15        |
| Bjead1_1          | <i>Bjerkandera adusta</i> v1.0                          | 12        |         | 1     |        | 11        |
| Botbo1            | <i>Botryobasidium botryosum</i> v1.0                    | 6         |         |       |        | 6         |
| Cersu1            | <i>Ceriporiopsis subvermisporea</i> B                   | 27        | 3       | 3     | 3      | 18        |
| Conpu1            | <i>Coniophora puteana</i> v1.0                          | 25        |         | 2     | 1      | 22        |
| Cop               | <i>Coprinopsis cinerea</i>                              | 6         |         |       |        | 6         |
| Cryne_H99_1       | <i>Cryptococcus neoformans</i> var. <i>grubii</i> H99   | 0         |         |       |        | 0         |
| Dacsp1            | <i>Dacryopinax</i> sp. DJM 731 SSP-1 v1.0               | 5         | 2       |       |        | 3         |
| Dicsq1            | <i>Dichomitus squalens</i> v1.0                         | 20        | 2       | 1     | 3      | 14        |
| Fomme1            | <i>Fomitiporia mediterranea</i> v1.0                    | 18        | 2       |       |        | 16        |
| Fompi1            | <i>Fomitopsis pinicola</i> SS1 v1.0                     | 22        | 1       | 2     | 2      | 17        |
| Gansp1            | <i>Ganoderma</i> sp. 10597 SS1 v1.0                     | 27        | 2       | 1     | 3      | 21        |
| Glotr1_1          | <i>Gloeophyllum trabeum</i> v1.0                        | 14        | 2       | 2     |        | 10        |
| Gymlu1            | <i>Gymnopus luxurians</i> v1.0                          | 24        | 3       | 4     |        | 17        |
| Hetan2            | <i>Heterobasidion annosum</i> v2.0                      | 16        | 1       |       |        | 15        |
| Hypsu1            | <i>Hypholoma sublateritium</i> v1.0                     | 14        | 1       | 1     | 1      | 11        |
| Jaaar1            | <i>Jaapia argillacea</i> v1.0                           | 12        |         | 1     |        | 11        |
| Lacbi1            | <i>Laccaria bicolor</i> v2.0                            | 27        | 6       | 7     | 5      | 9         |
| Malgl1            | <i>Malassezia globosa</i>                               | 0         |         |       |        | 0         |
| Mellp1            | <i>Melampsora laricis-populina</i> v1.0                 | 0         |         |       |        | 0         |
| <b>Omp</b>        | <b><i>Omphalotus olearius</i> VT-653.13</b>             | <b>11</b> |         |       |        | <b>11</b> |
| Paxin1            | <i>Paxillus involutus</i> ATCC 200175 v1.0              | 16        | 1       | 4     |        | 11        |
| Phaca1            | <i>Phanerochaete carnosa</i> HHB-10118-Sp v1.0          | 20        | 1       | 2     | 7      | 10        |
| Phchr1            | <i>Phanerochaete chrysosporium</i> v2.0                 | 10        | 3       |       | 2      | 5         |
| Phlbr1            | <i>Phlebia brevispora</i> HHB-7030 SS6 v1.0             | 18        | 1       | 3     | 3      | 11        |
| Phlgi1            | <i>Phlebiopsis gigantea</i> v1.0                        | 9         |         | 1     |        | 8         |
| PleosPC15_2       | <i>Pleurotus ostreatus</i> PC15 v2.0                    | 16        |         | 1     |        | 15        |
| Pospl1            | <i>Postia placenta</i> MAD-698                          | 41        | 11      | 3     | 5      | 22        |
| Pucgr1            | <i>Puccinia graminis</i>                                | 0         |         |       |        | 0         |

| <b>Abbreviation</b> | <b>Basidiomycota Reference Genome</b>       | <b>Initial</b> | <b>NSE/DTE</b> | <b>DDxxD</b> | <b>Length</b> | <b>Final</b> |
|---------------------|---------------------------------------------|----------------|----------------|--------------|---------------|--------------|
| Punst1              | <i>Punctularia strigosozonata v1.0</i>      | 12             | 1              |              |               | 11           |
| Rhoba1_1            | <i>Rhodotorula graminis strain WPI v1.1</i> | 0              |                |              |               | 0            |
| Schco2              | <i>Schizophyllum commune v2.0</i>           | 4              |                | 1            |               | 3            |
| SerlaS7_3_2         | <i>Serpula lacrymans S7.3 v2.0</i>          | 13             | 1              | 3            | 1             | 8            |
| Sporo1              | <i>Sporobolomyces roseus v1.0</i>           | 0              |                |              |               | 0            |
| Stehi1              | <i>Stereum hirsutum FP-91666 SS1 v1.0</i>   | 18             | 3              | 2            | 1             | 12           |
| Trave1              | <i>Trametes versicolor v1.0</i>             | 20             | 4              | 1            |               | 15           |
| Treme1              | <i>Tremella mesenterica Fries v1.0</i>      | 0              |                |              |               | 0            |
| Ustma1              | <i>Ustilago maydis</i>                      | 0              |                |              |               | 0            |
| Walse1              | <i>Wallemia sebi v1.0</i>                   | 0              |                |              |               | 0            |
| Wolco1              | <i>Wolfiporia cocos MD-104 SS10 v1.0</i>    | 22             | 2              | 2            | 1             | 17           |
|                     |                                             | <b>542</b>     | <b>55</b>      | <b>46</b>    | <b>44</b>     | <b>392</b>   |

**Table S5** Predicted biosynthetic gene clusters in *O. olearius* using SMURF (<http://jcvf.org/smurf/index.php>). Corresponding peptide reference numbers (**Data S1**) are included for each putative gene. Cluster position is indicated with the putative PKS/NRPS with a position of zero. Genes in the window are tagged as domain positive (1) if they contain at least one of the secondary metabolite domains recognized by SMURF, or domain negative (0) if they do not. The top conserved domain hit (CDD) at NCBI is listed in parentheses next to each ORFs putative function. The previously cloned *O. olearius fso1* (Welzel et al., 2005) and the fatty acid synthase (Antelo et al., 2009) are indicated. See **Figure 6** for the illudin biosynthetic cluster.

| Cluster - Scaffold #     | Peptide reference sequence           | Cluster Position | Domain score | Top conserved domain hit        |
|--------------------------|--------------------------------------|------------------|--------------|---------------------------------|
| Cluster 1 – Scaffold 192 |                                      |                  |              |                                 |
|                          | MUStwsD_GLEAN_10000751               | -3               | 1            | PGDH (cd05288)                  |
|                          | MUStwsD_GLEAN_10000750               | -2               | 1            | P450 (pfam00067)                |
|                          | MUStwsD_GLEAN_10000749               | -1               | 1            | MFS (cd06174)                   |
|                          | <b>PKS</b> → MUStwsD_GLEAN_10000748  | 0                | 1            | PKS (cd00833)                   |
| Cluster 2 – Scaffold 172 |                                      |                  |              |                                 |
|                          | MUStwsD_GLEAN_10000886               | -3               | 1            | MFS (cd06174)                   |
|                          | MUStwsD_GLEAN_10000885               | -2               | 0            | DUF2461 (pfam09365)             |
|                          | MUStwsD_GLEAN_10000884               | -1               | 0            | MPP_239FB (cd07379)             |
|                          | <b>PKS</b> → MUStwsD_GLEAN_10000883  | 0                | 0            | Macro_Appr_pase_like (cd02908)  |
| Cluster 3 – Scaffold 132 |                                      |                  |              |                                 |
|                          | <b>NRPS</b> → MUStwsD_GLEAN_10001307 | 0                | 0            | SDR_e1 (cd05235)                |
|                          | MUStwsD_GLEAN_10001306               | 1                | 0            | None                            |
|                          | MUStwsD_GLEAN_10001305               | 2                | 0            | AXO (cd01150)                   |
|                          | MUStwsD_GLEAN_10001304               | 3                | 0            | BBE (pfam08031)                 |
|                          | MUStwsD_GLEAN_10001303               | 4                | 1            | 17beta-HSD-like_SDR_c (cd05374) |
| Cluster 4 – Scaffold 82  |                                      |                  |              |                                 |
|                          | MUStwsD_GLEAN_10002091               | -11              | 1            | PHOX_C (cd02979)                |
|                          | MUStwsD_GLEAN_10002090               | -10              | 0            | ADIP (pfam11559)                |
|                          | MUStwsD_GLEAN_10002089               | -9               | 0            | None                            |
|                          | MUStwsD_GLEAN_10002088               | -8               | 0            | None                            |
|                          | MUStwsD_GLEAN_10002087               | -7               | 0            | BRLZ (smart00338)               |
|                          | MUStwsD_GLEAN_10002086               | -6               | 0            | Retinol-DH_like (cd05327)       |
|                          | MUStwsD_GLEAN_10002085               | -5               | 1            | AAT_like (cd00609)              |
|                          | MUStwsD_GLEAN_10002084               | -4               | 0            | Abhydrolase_3 (pfam07859)       |
|                          | MUStwsD_GLEAN_10002083               | -3               | 0            | Transferase (pfam02458)         |
|                          | MUStwsD_GLEAN_10002082               | -2               | 1            | MFS (cd06174)                   |
|                          | MUStwsD_GLEAN_10002081               | -1               | 1            | MDR_like_2 (cd05289)            |
|                          | <b>NRPS</b> → MUStwsD_GLEAN_10002080 | 0                | 0            | Peptidase_C19R (cd02674)        |
|                          | MUStwsD_GLEAN_10002079               | 1                | 0            | BAH_fungalPHD (cd04710)         |
|                          | MUStwsD_GLEAN_10002078               | 2                | 0            | HATPase_c (cd00075)             |
|                          | MUStwsD_GLEAN_10002077               | 3                | 0            | RanBD (cd00835)                 |
|                          | MUStwsD_GLEAN_10002076               | 4                | 0            | DPG_synthase (cd04188)          |
|                          | MUStwsD_GLEAN_10002075               | 5                | 1            | Salicylate_mono (TIGR03219)     |

| Cluster - Scaffold #       | Peptide reference sequence | Cluster Position | Domain score | Top conserved domain hit       |
|----------------------------|----------------------------|------------------|--------------|--------------------------------|
| Cluster 5 – Scaffold 74    |                            |                  |              |                                |
|                            | MUStwsD_GLEAN_10002282     | -5               | 1            | Aldo_ket_red (cd06660)         |
|                            | MUStwsD_GLEAN_10002281     | -4               | 0            | GMC_oxred_C (pfam05199)        |
|                            | MUStwsD_GLEAN_10002280     | -3               | 1            | P450 (pfam00067)               |
|                            | MUStwsD_GLEAN_10002279     | -2               | 0            | ALDH_F1-2_Ald2-like (cd07091)  |
|                            | MUStwsD_GLEAN_10002278     | -1               | 0            | None                           |
| <b>NRPS→</b>               | MUStwsD_GLEAN_10002277     | 0                | 0            | SDR_e1 (cd05235)               |
|                            | MUStwsD_GLEAN_10002276     | 1                | 1            | MFS (cd06174)                  |
|                            | MUStwsD_GLEAN_10002275     | 2                | 1            | P450 (pfam00067)               |
| Cluster 6 – Scaffold 58    |                            |                  |              |                                |
|                            | MUStwsD_GLEAN_10002754     | -7               | 1            | RhlG_SDR_c (cd08942)           |
|                            | MUStwsD_GLEAN_10002753     | -6               | 0            | GRX_SH3BGR (cd03030)           |
|                            | MUStwsD_GLEAN_10002752     | -5               | 0            | LMWPc (cd00115)                |
|                            | MUStwsD_GLEAN_10002751     | -4               | 0            | ALDH_F6_MMSDH (cd07085)        |
|                            | MUStwsD_GLEAN_10002750     | -3               | 0            | None                           |
|                            | MUStwsD_GLEAN_10002749     | -2               | 0            | PTZ00363 (PTZ00363)            |
|                            | MUStwsD_GLEAN_10002748     | -1               | 1            | PHOX_C (cd02979)               |
| <b>NRPS→</b>               | MUStwsD_GLEAN_10002747     | 0                | 0            | SDR_e1 (cd05235)               |
|                            | MUStwsD_GLEAN_10002746     | 1                | 0            | AR_SDR_e (cd05227)             |
|                            | MUStwsD_GLEAN_10002745     | 2                | 1            | CAD_like (cd08296)             |
|                            | MUStwsD_GLEAN_10002744     | 3                | 1            | Methyltransf_2 (pfam00891)     |
|                            | MUStwsD_GLEAN_10002743     | 4                | 0            | AP_endonuc_2 (pfam01261)       |
|                            | MUStwsD_GLEAN_10002742     | 5                | 1            | TRAPPC_Tr85 (pfam12739)        |
|                            | MUStwsD_GLEAN_10002741     | 6                | 0            | Mpv17_PMP22 (pfam04117)        |
|                            | MUStwsD_GLEAN_10002740     | 7                | 0            | Mito_carr (pfam00153)          |
|                            | MUStwsD_GLEAN_10002739     | 8                | 1            | SMC_prok_B (TIGR02168)         |
| Cluster 7 – Scaffold 50    |                            |                  |              |                                |
|                            | MUStwsD_GLEAN_10003056     | -6               | 1            | P450 (pfam00067)               |
|                            | MUStwsD_GLEAN_10003055     | -5               | 0            | None                           |
|                            | MUStwsD_GLEAN_10003054     | -4               | 0            | Cellulase (pfam00150)          |
|                            | MUStwsD_GLEAN_10003053     | -3               | 1            | Dnd_assoc_3 (TIGR03238)        |
|                            | MUStwsD_GLEAN_10003052     | -2               | 0            | lucD (COG3486)                 |
|                            | MUStwsD_GLEAN_10003051     | -1               | 0            | AlcB (smart01006)              |
| <b>NRPS (<i>fsol</i>)→</b> | MUStwsD_GLEAN_10003050     | 0                | 1            | PRK12316 (PRK12316)            |
|                            | MUStwsD_GLEAN_10003049     | 1                | 0            | HAD_like (cd01427)             |
|                            | MUStwsD_GLEAN_10003048     | 2                | 0            | GT1_Glycogen_Phos (cd04300)    |
|                            | MUStwsD_GLEAN_10003047     | 3                | 0            | NPD_like (cd04730)             |
|                            | MUStwsD_GLEAN_10003046     | 4                | 0            | PRK06334 (PRK06334)            |
|                            | MUStwsD_GLEAN_10003045     | 5                | 1            | ABCC_MRP_domain2 (cd03244)     |
|                            | MUStwsD_GLEAN_10003044     | 6                | 1            | MFS (cd06174)                  |
| Cluster 8 – Scaffold 39    |                            |                  |              |                                |
|                            | MUStwsD_GLEAN_10003602     | -2               | 1            | SPD_interacting (pfam08616)    |
|                            | MUStwsD_GLEAN_10003601     | -1               | 0            | Pepsin_like (cd05471)          |
| <b>PKS→</b>                | MUStwsD_GLEAN_10003600     | 0                | 0            | PKS (cd00833)                  |
| Cluster 9 – Scaffold 18    |                            |                  |              |                                |
|                            | MUStwsD_GLEAN_10005128     | -1               | 1            | Enoyl_reductase_like (cd08249) |
| <b>PKS→</b>                | MUStwsD_GLEAN_10005127     | 0                | 1            | PKS (cd00833)                  |
|                            | MUStwsD_GLEAN_10005126     | 1                | 0            | PLN02464 (PLN02464)            |
|                            | MUStwsD_GLEAN_10005125     | 2                | 0            | rpsS (PRK00357)                |
|                            | MUStwsD_GLEAN_10005124     | 3                | 0            | None                           |



| Cluster - Scaffold #    | Peptide reference sequence | Cluster Position | Domain score | Top conserved domain hit      |
|-------------------------|----------------------------|------------------|--------------|-------------------------------|
|                         | MUStwsD_GLEAN_10005123     | 4                | 0            | PTZ00096 (PTZ00096)           |
|                         | MUStwsD_GLEAN_10005122     | 5                | 0            | Ribosomal_P2 (cd05833)        |
|                         | MUStwsD_GLEAN_10005121     | 6                | 1            | Fungal_trans (smart00906)     |
| Cluster 10 – Scaffold 2 |                            |                  |              |                               |
|                         | MUStwsD_GLEAN_10007722     | -5               | 0            | ATP_synt_H (pfam05493)        |
|                         | MUStwsD_GLEAN_10007721     | -4               | 0            | Bacter_Hen1 (TIGR04074)       |
|                         | MUStwsD_GLEAN_10007720     | -3               | 0            | ispDF (PRK09382)              |
|                         | MUStwsD_GLEAN_10007719     | -2               | 0            | RhoGAP_fSAC7_BAG7 (cd04396)   |
|                         | MUStwsD_GLEAN_10007718     | -1               | 0            | Drf_GBD (pfam06371)           |
| <b>NRPS (FAS)→</b>      | MUStwsD_GLEAN_10007717     | 0                | 0            | KR_fFAS_SDR_c_like (cd08950)  |
|                         | MUStwsD_GLEAN_10007716     | 1                | 1            | DEADc (cd00268)               |
|                         | MUStwsD_GLEAN_10007715     | 2                | 0            | GH16_Lam16A_gluc (cd02181)    |
|                         | MUStwsD_GLEAN_10007714     | 3                | 0            | ALDH_EDX86601 (cd07102)       |
|                         | MUStwsD_GLEAN_10007713     | 4                | 0            | None                          |
|                         | MUStwsD_GLEAN_10007712     | 5                | 0            | Gtr1_RagA (pfam04670)         |
|                         | MUStwsD_GLEAN_10007711     | 6                | 0            | PolyPPase_VTC4_like (cd07751) |
|                         | MUStwsD_GLEAN_10007710     | 7                | 0            | DUF3468 (pfam11951)           |
|                         | MUStwsD_GLEAN_10007709     | 8                | 1            | GAL4 (cd00067)                |
|                         | MUStwsD_GLEAN_10007708     | 9                | 1            | PH (cd00821)                  |

**Table S6** Comparison of the number of predicted cytochrome P450 and sesquiterpene synthase (STS) genes in *O. olearius* with other Basidiomycota genomes in the Fungal Cytochrome P450 Database (<http://p450.riceblast.snu.ac.kr/index.php?a=view>). Shown is also the number of total ORFs for each genome sequence as well as the percentage of total predicted ORFs that are putative P450 enzymes. See **Figure 6** for the illudin biosynthetic cluster.

| Basidiomycota reference genome                 | STS       | P450       | ORF          | P450 %        |
|------------------------------------------------|-----------|------------|--------------|---------------|
| <i>Agaricus bisporus</i>                       | 6         | 117        | 10,438       | 1.12 %        |
| <i>Bjerkandera adusta</i>                      | 11        | 188        | 15,473       | 1.22 %        |
| <i>Coprinus cinereus</i>                       | 6         | 139        | 13,410       | 1.04 %        |
| <i>Cryptococcus neoformans</i>                 | 0         | 5          | 6,475        | 0.08 %        |
| <i>Dichomitus squalens</i>                     | 14        | 175        | 12,290       | 1.42 %        |
| <i>Heterobasidion annosum</i>                  | 15        | 143        | 13,405       | 1.07 %        |
| <i>Laccaria bicolor</i>                        | 9         | 91         | 20,614       | 0.44 %        |
| <i>Malassezia globosa</i>                      | 0         | 6          | 4,286        | 0.14 %        |
| <i>Melampsora larici-populina</i> 98AG31       | 0         | 29         | 16,694       | 0.17 %        |
| <b><i>Omphalotus olearius</i> VT-653.13</b>    | <b>11</b> | <b>121</b> | <b>8,172</b> | <b>1.48 %</b> |
| <i>Phanerochaete chrysosporium</i>             | 5         | 145        | 10,048       | 1.44 %        |
| <i>Pleurotus ostreatus</i>                     | 15        | 141        | 11,603       | 1.22 %        |
| <i>Postia placenta</i>                         | 22        | 353        | 17,173       | 2.06 %        |
| <i>Puccinia graminis</i> f. sp. <i>tritici</i> | 0         | 18         | 20,567       | 0.09 %        |
| <i>Schizophyllum commune</i> H4-8              | 3         | 115        | 13,181       | 0.87 %        |
| <i>Serpula lacrymans</i> S7.3                  | 8         | 161        | 14,495       | 1.11 %        |
| <i>Sporobolomyces roseus</i>                   | 0         | 7          | 5,536        | 0.13 %        |
| <i>Tremella mesenterica</i>                    | 0         | 8          | 8,313        | 0.10 %        |
| <i>Ustilago maydis</i> FBI                     | 0         | 21         | 6,950        | 0.30 %        |

## Supplemental Figures

**Figure S1** Mass spectra of identified sesquiterpenoid compounds. Compound numbers correspond to compound names discussed in the main text and shown in figures. See **Figure 2**, **Figure 3**, and **Figure 4** for individual compound occurrences. Values for the measured retention index (RI) (top) and the library values (bottom) are listed below each compound name.

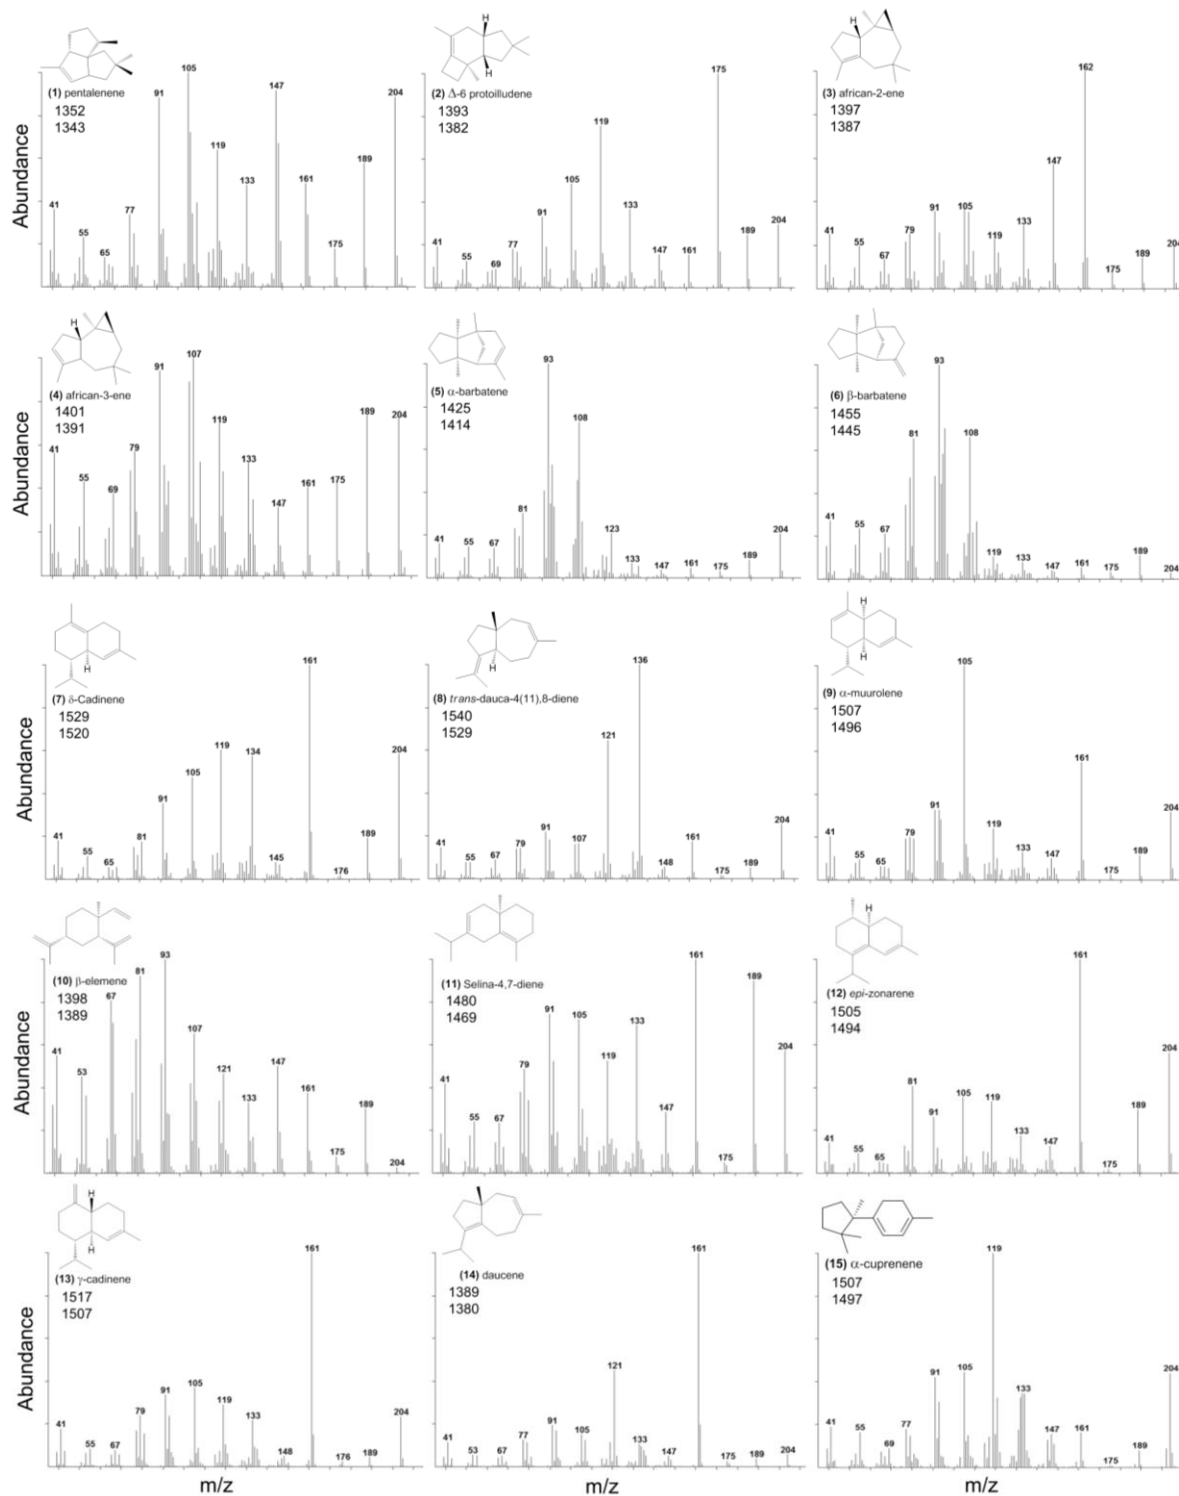

**Figure S2** Time course of sesquiterpene production by *O. olearius*. Volatile metabolites produced by liquid cultures of *O. olearius* were sampled by solid phase microextraction (SPME) and analyzed by Gas Chromatography-Mass Spectrometry (GC-MS). Identified sesquiterpene compounds are numbered and structures are shown in **Figure 2** (see **Figure S1** for mass spectra for each compound). One major sesquiterpene product and many small terpene peaks could not be conclusively identified. Culture conditions between the two cultures shown here (**a** and **b**) and the culture shown in **Figure 2** were identical but resulted in significantly different relative sesquiterpene levels.

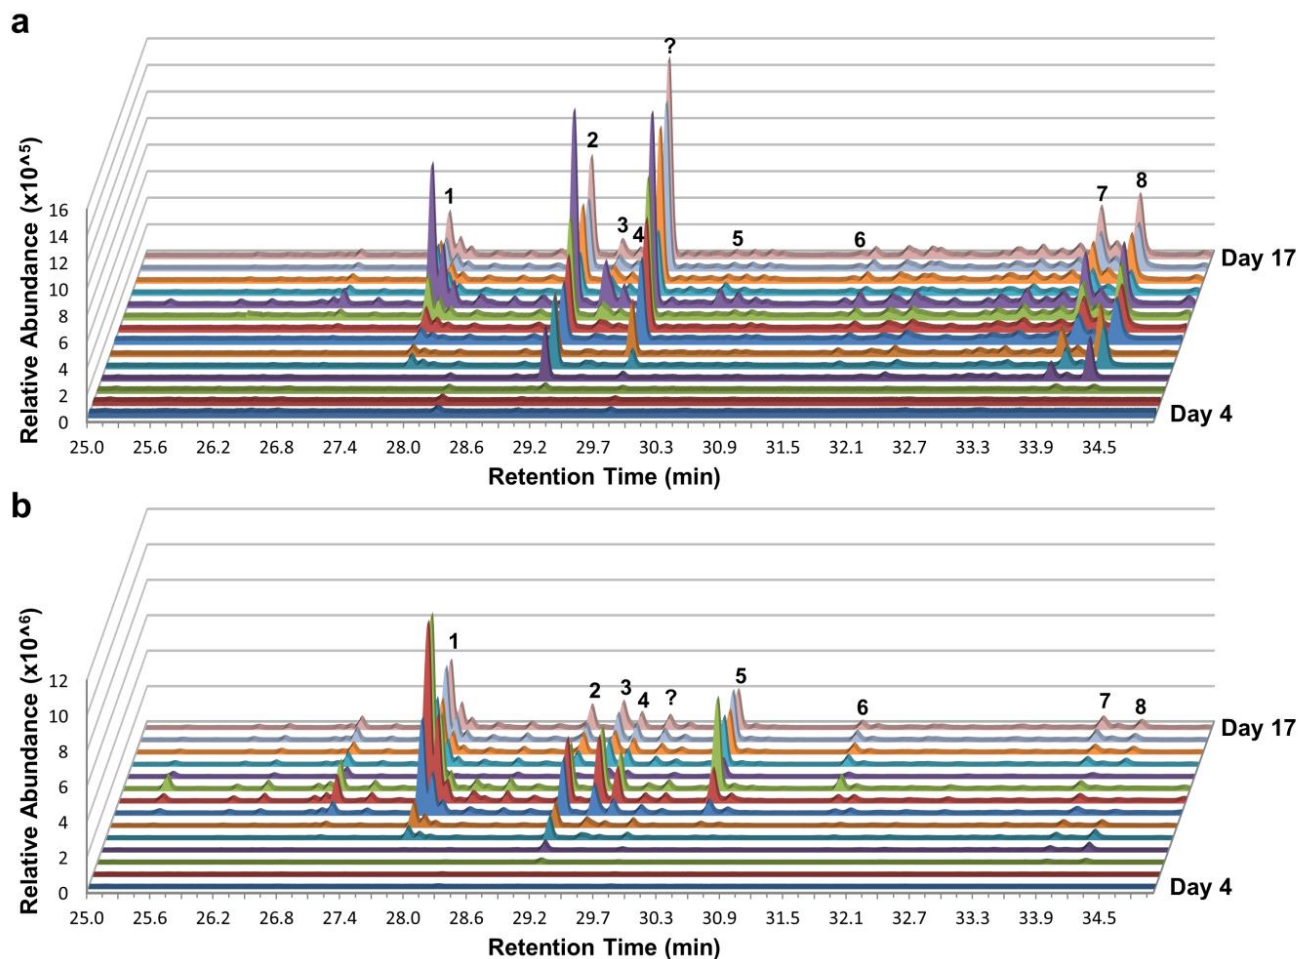

**Figure S3** *O. olearius* sesquiterpene synthase (Omp1-10) expression analysis in *E. coli*. Protein levels for each Omp protein, under constitutive expression in *E. coli* strain BL21, were visualized by SDS-PAGE and Coomassie staining. Total lysate (T) or the soluble fraction (S), collected after centrifugation, was analyzed. An empty vector was used as a control. Expected sizes in kDa for the analyzed Omp proteins are 38.2 (Omp1), 38.1 (Omp2), 41.8 (Omp3), 39.1 (Omp4), 39.2 (Omp5a), 39.5 (Omp5b), 41.1 (Omp6), 39.8 (Omp7), 40.0 (Omp8), 39.5 (Omp9), and 36.6 (Omp10). See **Figure 3** for sesquiterpene production in *E. coli* by each sesquiterpene synthase.

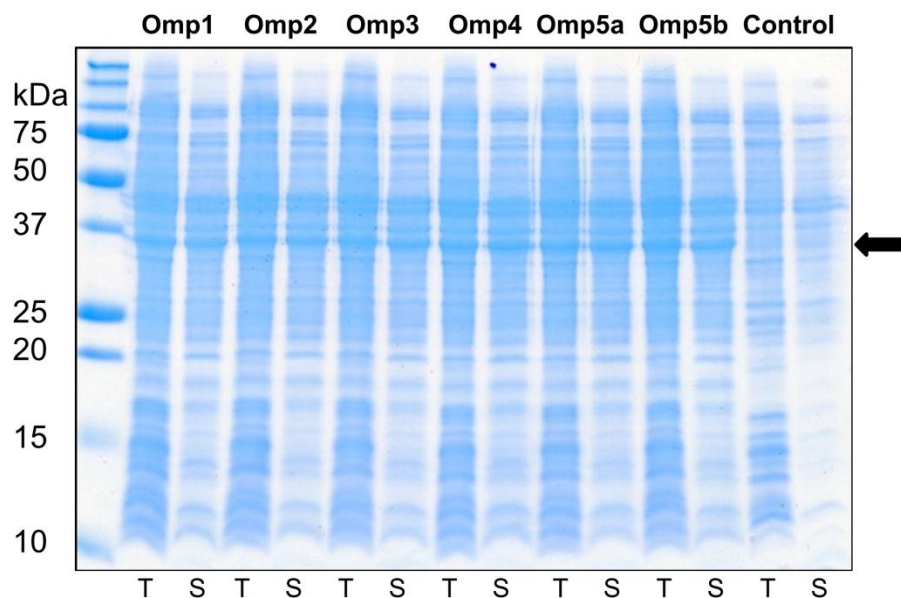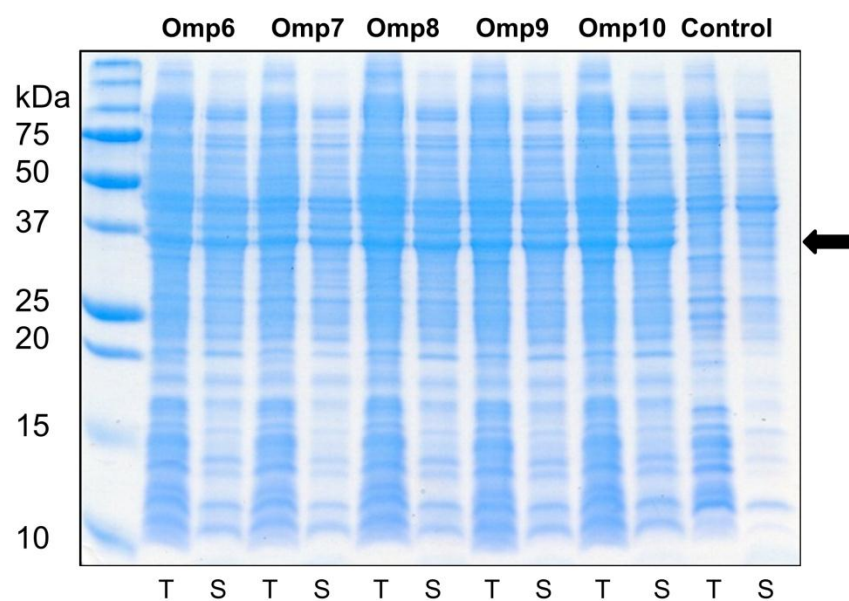

**Figure S4** Expression of Omp6, Omp7 and putative modifying enzymes in *O. olearius* liquid cultures. qRT-PCR analysis of the putative Omp6 biosynthetic cluster showed that these adjacent genes displayed analogous expression profiles, suggesting that Omp6, 6-j, 6-k and 6-l are transcriptionally co-regulated. Comparable expression patterns of Omp7 and 7-b also suggest that these two genes belong to a functional biosynthetic cluster. Levels of  $\Delta$ -6 protoilludene in culture headspace increased steadily over time, likely due to gradual accumulation of  $\Delta$ -6 protoilludene synthase enzymes. Transcript and  $\Delta$ -6 protoilludene levels were normalized in order to have each respective maximum align with a value of one. Error bars represent the standard deviation of 3 replicates. See **Table S3** for gene information and **Figure 6** for illudin cluster organization.

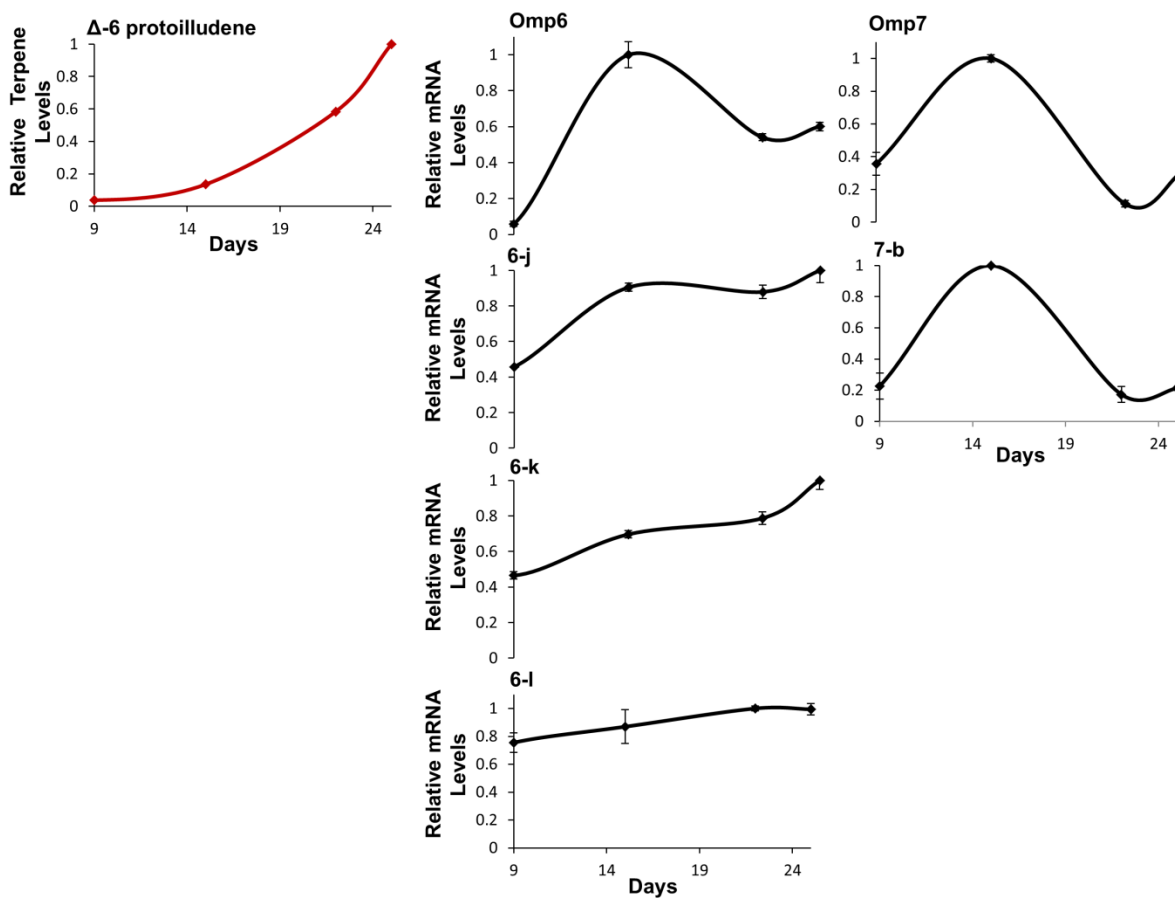

**Figure S5** Identification and characterization of a new STS, Fompi1, from *Fomitopsis pinicola* strain CS-1. (a) Biosynthetic cluster prediction for the genomic region surrounding Fompi1. The cluster consists of a STS and two putative P450 enzymes. (b) GC-MS analysis of *E. coli* cultures expressing Fompi1. The major product,  $\alpha$ -cuprenene **15**, is labeled and the structure can be found in **Figure S1**. The second largest peak, with a retention time of roughly 26 min, is the endogenous production of indole in *E. coli*, as described previously.  $\alpha$ -cuprenene was identified by comparison with  $\alpha$ -cuprenene produced by Cop6 from *C. cinereus* (Agger et al., 2009). See the phylogram in **Figure 7** for information on gene homology.

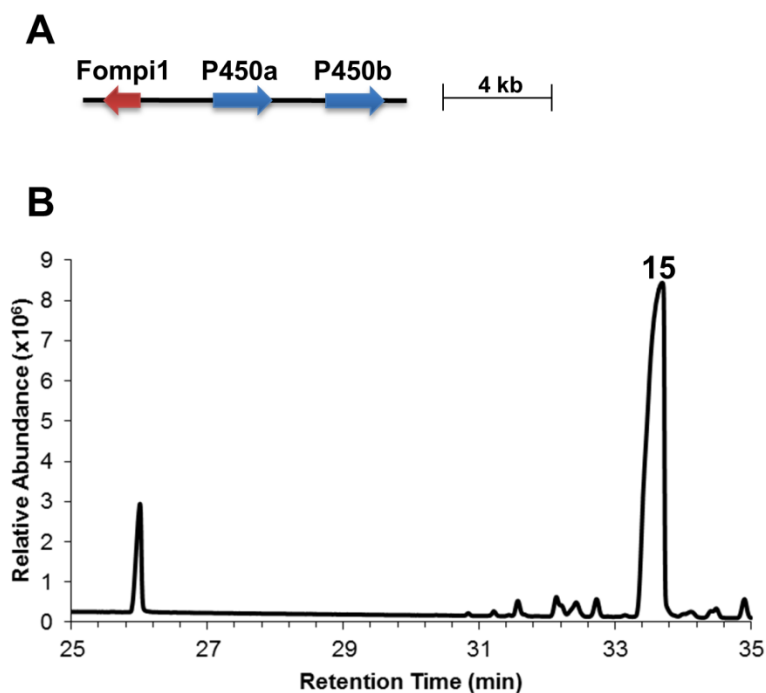

## KEY FOR SUPPLEMENTAL DATA SETS 1-3

The following describes file contents included in the supplementary data sets 1-3.

**Data S1** Gene and protein sequence predictions & Protein function annotation results.

|                         |                                                            |
|-------------------------|------------------------------------------------------------|
| Scaffold.fa.Glean.cds   | Coding sequences for all predicted proteins                |
| Scaffold.fa.Glean.pep   | Amino acid sequences for all predicted proteins            |
| *.kegg.list.anno        | KEGG annotation result file                                |
| *.kegg.list.filter      | Result file in M8 format of BLAST alignment with KEGG      |
| KEGG_MAP/*              | KEGG map of metabolic pathway                              |
| *.kog.list.anno         | KOG annotation result file                                 |
| *.kog.list.filter       | Result file in M8 format of BLAST alignment with KOG       |
| *.swissprot.list.anno   | SwissProt annotation result file                           |
| *.swissprot.list.filter | Result file in M8 format of BLAST alignment with SwissProt |
| *.treml.list.anno       | Treml annotation result file                               |
| *.treml.list.filter     | Result file in M8 format of BLAST alignment with Treml     |
| *.nr.list.anno          | NR annotation result file                                  |
| *.nr.list.filter        | Result file in M8 format of BLAST alignment with NR        |
| *.iprscan.gene.ipr      | Ipr number and annotation result                           |
| *.iprscan.gene.GO       | GO number and annotation result                            |

**Data S2** Complete sequence information for characterized *O. olearius* sesquiterpene synthases (STS) & Alignment and tree file of Basidiomycota sesquiterpene synthases.

|                               |                                                                                                           |
|-------------------------------|-----------------------------------------------------------------------------------------------------------|
| OoleariusSTS_gDNA_cds_pep.fas | Coding sequences, amino acid sequences, and genomic regions for all 11 STS, including biosynthetic genes. |
| allsequences_clustalw.fas     | FASTA alignment of all basidiomycota STS for Figure 6                                                     |
| allsequences_clustalw.mts     | MEGA tree file used to generate Figure 6                                                                  |

**Data S3 – Predicted P450 sequences in *O. olearius*.**

|                     |                                             |
|---------------------|---------------------------------------------|
| O_olearius_P450.fas | FASTA file containing putative P450 enzymes |
|---------------------|---------------------------------------------|



## SUPPLEMENTAL EXPERIMENTAL PROCEDURES

### *Cloning of sesquiterpene synthases*

*O. olearius* or *F. pinicola* mRNA was extracted using the TRIzol® reagent (Invitrogen, Carlsbad, CA) following the manufacturers protocol. The extracted mRNA was used with the Superscript® III First-Strand Synthesis SuperMix kit (Invitrogen, Carlsbad, CA) to synthesize cDNA for subsequent amplification of the biosynthetic genes.

A first round of PCR with *Taq* polymerase (New England Biolabs, Ipswich, MA) was carried out with primers designed against the conserved DDxxD motif and the NSE/DTE motifs of terpene synthases in conjunction with outside gene-specific primers. The two amplification products obtained for each of the putative STS genes were then assembled by overlap-extension PCR to the predicted full-length gene sequences. PCR products were TA ligated into the pCR2.1-TOPO vector (Invitrogen, Carlsbad, CA) and transformed into *E. coli* TOP10. Cloned sequences were verified by DNA sequencing. Mutations introduced by PCR were repaired by site-directed mutagenesis using the QuikChange protocol (Stratagene, La Jolla, CA) and missing 5' or 3' sequences were added by overlap extension PCR. The chimeric *Omp8* gene was synthesized by Life Technologies Corporation (previously GeneArt®). The final STS sequences were each cloned into our in-house vector pUCBB (Vick et al.) by ligation-independent cloning (Aslanidis and de Jong, 1990) for expression under the control of a constitutive *lac* promoter (Schmidt-Dannert et al., 2000) for subsequent analysis of recombinant sesquiterpene production in *E. coli* BL21.

### *Overexpression and purification of Omp6 and Omp7*

Omp6 and Omp7 were cloned into pET32b(+) (Novagen) using *Bam*HI and *Not*I restriction sites. Overnight cultures of *E. coli* BL21 (DE3) cells harboring Omp6-pET32b and Omp7-pET32b were used to inoculate 0.5 L of LB media supplemented with 100 µg/ml ampicillin. The cultures were incubated at 30 °C with shaking at 300 rpm until an OD<sub>600</sub> of 0.6 was reached. Protein overexpression was induced by addition of 1 mM IPTG and incubation at 30 °C for an additional 4 hours. Cells were harvested by centrifugation at 3000 x g for 30 min at 4 °C and the resulting pellet was resuspended in lysis buffer (20 mM Tris-HCl pH 8.0, 200 mM NaCl, 10 mM MgCl<sub>2</sub>). The cells were lysed by sonication and the slurry was clarified by centrifugation at 10,000 x g for 30 min. The soluble thioredoxin-tagged proteins were purified metal-affinity chromatography, using BD TALON resin (Clontech, Mountain View, CA), by following the manufacturer's procedures. Cleavage of the thioredoxin tag was carried out using enterokinase (Novagen) at 4 °C overnight, and the enterokinase was removed from the reaction mixture using the agarose spin columns provided by the manufacturer. The complete cleavage of the thioredoxin tag was verified by SDS-PAGE, and the cleaved tag was separated from Omp6 and Omp7 using Ni-NTA Spin Columns (QIAGEN). The proteins were judged to be > 90 % pure by SDS-PAGE, and were subsequently used for in vitro enzymatic assays, which were performed as described previously (Lopez-Gallego et al., 2010).

### ***Homology searches, phylogenetic tree construction and biosynthetic cluster prediction***

The six fungal STS previously identified from *C. cinereus* (Agger et al., 2009) used with the NCBI BLAST (Altschul et al., 1990) software to perform homology searches of the *O. olearius* assembly. A BLAST search with Cop1-3, which share greater than 45 % amino acid sequence identity, identified a set of three putative sesquiterpene synthases (STS) from *O. olearius*, Omp1-3. A search using Cop4 returned three more putative STS, Omp4, 5a, and 5b.

Omp5a and 5b shared very high amino acid sequence identity (89%) and are adjacent to one another on the same scaffold. Two full-length putative STS sequences (Omp9 & 10) and one partial sequence missing ~100 amino acids from its N-terminal region (Omp8) were identified that were most closely related to Cop6. Two additional putative STS from *O. olearius*, Omp6 and Omp7, were identified that were most closely related to Cop5.

Following the identification of 11 STS sequences from *O. olearius*, all 17 STS protein sequences from both *C. cinereus* and *O. olearius* were used to search basidiomycete genomes hosted by the Joint Genome Institute under the Fungal Genomics Program (<http://genome.jgi-psf.org/programs/fungi/index.jsf>) (Martin et al., 2011).

Upon identification of putative STS amino acid sequences in other basidiomycete genomes, alignments were computed using ClustalW (Thompson et al., 2002) and phylogenetic analyses were conducted using MEGA version 5.05 (Tamura et al., 2011) using the default parameters for the Neighbor-Joining method (Saitou and Nei, 1987) with a bootstrap test of phylogeny (500 replicates) (Felsenstein, 1985). Alignments were manually refined by removing STS sequences that did not contain both of the well conserved metal-binding motifs characteristic for sesquiterpene synthases (Christianson, 2006), showed clear mistakes in splicing predictions, or were not a characteristic length (250-425 amino acids) for this class of enzyme.

For the identification putative sesquiterpene biosynthetic gene clusters, each of the scaffolds containing the 11 STS from *O. olearius* and the scaffold containing *Fompi1* were analyzed for the presence of nearby enzymes implicated in secondary metabolite biosynthesis. Gene predictions were repeated using Augustus (Stanke et al., 2004) and nearby genes were assigned a putative function based on the presence of conserved domains (CDD).

### ***Quantitative RT-PCR***

Liquid cultures of *O. olearius* VT-653.13 were inoculated and grown as described above. At different time-points, the culture headspace was assayed for sesquiterpene production, and fungal tissue was harvested. *O. olearius* mRNA and cDNA were prepared using the protocols described above. Quantitative real-time PCR (qRT-PCR) was conducted on an Applied Biosystems 7900HT Fast Real-Time PCR System, using a previously described protocol (Kurrasch et al., 2004). cDNAs (100 ng) were added to a 10  $\mu$ l qRT-PCR mix containing 5  $\mu$ l Power SYBR Green PCR Master Mix (Applied Biosystems) and 150 nM primers. Each reaction was performed in triplicate, and non-reverse-transcribed samples were used as controls. All primer pairs were validated by cDNA template titration, and their efficiencies were assessed using the slope of the qRT-PCR standard curve. Expression levels of the housekeeping gene beta-tubulin were used to determine changes in transcript levels of each gene (*n*-fold) by comparing mean threshold cycle values.

## SUPPLEMENTAL REFERENCES

Agger, S., Lopez-Gallego, F., and Schmidt-Dannert, C. (2009). Diversity of sesquiterpene synthases in the basidiomycete *Coprinus cinereus*. *Mol. Microbiol.* 72, 1181-1195.

Altschul, S.F., Gish, W., Miller, W., Myers, E.W., and Lipman, D.J. (1990). Basic local alignment search tool. *J. Mol. Biol.* 215, 403-410.

Antelo, L., Schlipp, A., Hof, C., Einfeld, K., Berg, H., Hornbogen, T., Zocher, R., and Anke, H. (2009). The fatty acid synthase of the basidiomycete *Omphalotus olearius* is a single polypeptide. *Z. Naturforsch. (C)* 64, 244-250.

Aslanidis, C., and de Jong, P.J. (1990). Ligation-independent cloning of PCR products (LIC-PCR). *Nucleic Acids Res.* 18, 6069-6074.

Christianson, D.W. (2006). Structural biology and chemistry of the terpenoid cyclases. *Chem. Rev.* 106, 3412-3442.

Felsenstein, J. (1985). Confidence-limits on phylogenies - an approach using the bootstrap. *Evolution* 39, 783-791.

Guo, A.-Y., Zhu, Q.-H., Chen, X., and Luo, J.-C. (2007). GSDS: a gene structure display server. *Yi chuan* 29, 1023-1026.

Kurrasch, D.M., Huang, J., Wilkie, T.M., and Repa, J.J. (2004). Quantitative real-time polymerase chain reaction measurement of regulators of G-protein signaling mRNA levels in mouse tissues. *Methods Enzymol* 389, 3-15.

- Lopez-Gallego, F., Wawrzyn, G.T., and Schmidt-Dannert, C. (2010). Selectivity of fungal sesquiterpene synthases: Role of the active site's H-1 alpha loop in catalysis. *Appl. Environ. Microbiol.* 76, 7723-7733.
- Martin, F., Cullen, D., Hibbett, D., Pisabarro, A., Spatafora, J.W., Baker, S.E., and Grigoriev, I.V. (2011). Sequencing the fungal tree of life. *New Phytol.* 190, 818-821.
- Saitou, N., and Nei, M. (1987). The neighbor-joining method - a new method for reconstructing phylogenetic trees. *Mol. Biol. Evol.* 4, 406-425.
- Schmidt-Dannert, C., Umeno, D., and Arnold, F.H. (2000). Molecular breeding of carotenoid biosynthetic pathways. *Nat. Biotechnol.* 18, 750-753.
- Stanke, M., Steinkamp, R., Waack, S., and Morgenstern, B. (2004). AUGUSTUS: a web server for gene finding in eukaryotes. *Nucleic Acids Res.* 32, W309-W312.
- Tamura, K., Peterson, D., Peterson, N., Stecher, G., Nei, M., and Kumar, S. (2011). MEGA5: Molecular evolutionary genetics analysis using maximum likelihood, evolutionary distance, and maximum parsimony methods. *Mol. Biol. Evol.* 28, 2731-2739.
- Thompson, J.D., Gibson, T.J., and Higgins, D.G. (2002). Multiple sequence alignment using ClustalW and ClustalX. *Current Protocols in Bioinformatics* Chapter 2, Unit 2.3.
- Vick, J.E., Johnson, E.T., Choudhary, S., Bloch, S.E., Lopez-Gallego, F., Srivastava, P., Tikh, I.B., Wawrzyn, G.T., and Schmidt-Dannert, C. Optimized compatible set of BioBrick vectors for metabolic pathway engineering. *Appl. Microbiol. Biotechnol.* 92, 1275-1286.
- Welzel, K., Einfeld, K., Antelo, L., Anke, T., and Anke, H. (2005). Characterization of the ferrichrome A biosynthetic gene cluster in the homobasidiomycete *Omphalotus olearius*. *FEMS Microbiol. Lett.* 249, 157-163.
